# Supplementary material for: Importance of the CH/π hydrogen bond in the enhancement of CD amplitude of exomethylene steroids
Source: Royal Society of Chemistry journal article supplement (doi:10.1039/c2ra21446f), 2012-01-01

## Importance of the CH/ $\pi$ hydrogen bond in the enhancement of CD amplitude of exomethylene steroids

Osamu Takahashi, Katsuyoshi Yamasaki, Yuji Kohno, Kazuyoshi Ueda and Motohiro Nishio

### Supplementary materials

Optimized Cartesian coordinates of model molecules.

(a) 1''

|   |          |          |          |
|---|----------|----------|----------|
| C | 0.1201   | 0.822466 | -0.23057 |
| C | -0.34016 | -0.64792 | 0.003042 |
| C | 0.005141 | -1.09693 | 1.401987 |
| C | -0.61544 | -0.25043 | 2.479389 |
| C | -0.21392 | 1.214137 | 2.289007 |
| C | -0.52214 | 1.68975  | 0.869597 |
| H | -1.44074 | -0.61942 | -0.04937 |
| H | -1.70691 | -0.3265  | 2.413134 |
| H | -0.32407 | -0.60922 | 3.468992 |
| H | -0.73954 | 1.845743 | 3.009692 |
| H | 0.852963 | 1.324038 | 2.496943 |
| H | -1.60886 | 1.682433 | 0.722112 |
| H | -0.19684 | 2.726662 | 0.762927 |
| C | -0.39614 | 1.284502 | -1.62024 |
| C | 0.126594 | -1.58274 | -1.1071  |
| H | 1.218951 | -1.62179 | -1.13623 |
| H | -0.21825 | -2.59806 | -0.89553 |
| C | -0.01287 | 0.32693  | -2.76271 |
| H | 1.078258 | 0.360391 | -2.88212 |
| C | -0.41241 | -1.11279 | -2.45223 |
| H | -1.50661 | -1.17815 | -2.44107 |

|   |          |          |          |
|---|----------|----------|----------|
| H | -0.06825 | -1.77012 | -3.25626 |
| H | -1.49619 | 1.266899 | -1.55655 |
| C | 1.647583 | 0.929736 | -0.14162 |
| H | 2.138315 | 0.52026  | -1.02366 |
| H | 1.955053 | 1.971835 | -0.04645 |
| H | 2.027244 | 0.386642 | 0.722754 |
| C | 0.823033 | -2.12237 | 1.686335 |
| H | 1.288168 | -2.72297 | 0.918123 |
| H | 1.036566 | -2.39074 | 2.712947 |
| C | -0.63134 | 0.787009 | -4.08559 |
| H | -0.33367 | 0.099986 | -4.88309 |
| H | -1.72204 | 0.717842 | -4.00218 |
| C | -0.2437  | 2.218818 | -4.44037 |
| H | -0.72769 | 2.525296 | -5.37077 |
| H | 0.835953 | 2.267885 | -4.61408 |
| C | 0.017266 | 2.716089 | -1.9877  |
| H | 1.106439 | 2.761805 | -2.08509 |
| H | -0.25943 | 3.413778 | -1.19566 |
| C | -0.61216 | 3.168006 | -3.30496 |
| H | -1.70097 | 3.191686 | -3.1935  |
| H | -0.2968  | 4.187444 | -3.54018 |

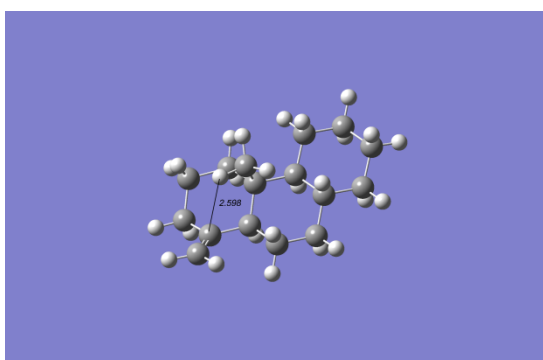

(b) 2''

|   |          |          |          |
|---|----------|----------|----------|
| C | -0.02577 | 0.799879 | -0.23578 |
| C | -0.4232  | -0.67334 | 0.022258 |
| C | 0.016822 | -1.09859 | 1.40377  |
| C | -0.52397 | -0.23766 | 2.511662 |
| C | -0.10252 | 1.213925 | 2.278904 |

|   |          |          |          |
|---|----------|----------|----------|
| C | -0.53765 | 1.696808 | 0.897428 |
| H | -1.52479 | -0.69883 | 0.014548 |
| H | -1.61849 | -0.29229 | 2.5192   |
| H | -0.17326 | -0.59495 | 3.482142 |
| H | -0.52056 | 1.863179 | 3.052249 |
| H | 0.986393 | 1.280124 | 2.358033 |
| H | -1.63305 | 1.722977 | 0.850728 |
| H | -0.19228 | 2.721393 | 0.754206 |
| C | -0.51427 | 1.270621 | -1.61897 |
| C | 0.067337 | -1.58293 | -1.09893 |
| H | 1.161954 | -1.58249 | -1.10725 |
| H | -0.2494  | -2.6109  | -0.90571 |
| C | -0.03038 | 0.330613 | -2.73411 |
| H | 1.0691   | 0.372528 | -2.73662 |
| C | -0.44284 | -1.11067 | -2.45386 |
| H | -1.53639 | -1.178   | -2.47891 |
| H | -0.06981 | -1.76276 | -3.2491  |
| H | -1.61499 | 1.22573  | -1.60932 |
| C | 0.864288 | -2.10994 | 1.64806  |
| H | 1.283691 | -2.72224 | 0.863589 |
| H | 1.151833 | -2.3536  | 2.66258  |
| C | -0.51803 | 0.794065 | -4.10716 |
| H | -0.14276 | 0.112185 | -4.87563 |
| H | -1.61163 | 0.725748 | -4.13249 |
| C | -0.09455 | 2.227902 | -4.40858 |
| H | -0.47657 | 2.54344  | -5.38232 |
| H | 0.997484 | 2.276531 | -4.46562 |
| C | -0.10504 | 2.714625 | -1.93273 |
| H | 0.988174 | 2.784798 | -1.88582 |
| H | -0.49737 | 3.397433 | -1.17813 |
| C | -0.5841  | 3.167226 | -3.31164 |
| H | -1.67872 | 3.185565 | -3.31903 |
| H | -0.2514  | 4.189944 | -3.50465 |
| H | 1.073907 | 0.840876 | -0.23563 |

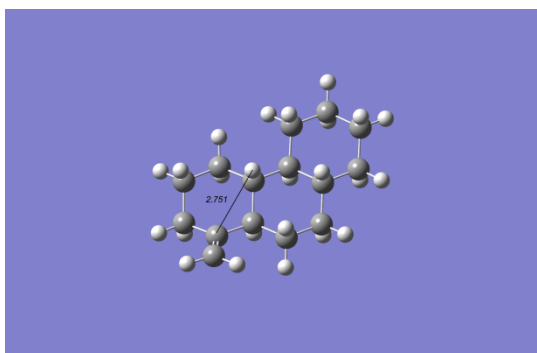

(c) 3''

|   |          |          |          |
|---|----------|----------|----------|
| C | 0.25997  | 0.921333 | 0.268385 |
| C | -0.36612 | -0.49991 | 0.142003 |
| C | -0.07922 | -1.39248 | 1.348726 |
| C | -0.57167 | -0.74181 | 2.638009 |
| C | 0.048849 | 0.639468 | 2.819126 |
| C | -0.21043 | 1.530101 | 1.603507 |
| H | -1.4557  | -0.3344  | 0.13071  |
| H | -1.66127 | -0.64352 | 2.594587 |
| H | -0.34629 | -1.37879 | 3.496697 |
| H | -0.35373 | 1.122378 | 3.713052 |
| H | 1.124377 | 0.535702 | 2.984401 |
| H | -1.28816 | 1.720437 | 1.531928 |
| H | 0.270534 | 2.498237 | 1.759646 |
| C | -0.2746  | 1.782792 | -0.90982 |
| C | -0.01156 | -1.10071 | -1.19243 |
| C | -0.017   | 1.152794 | -2.28986 |
| H | 1.066552 | 1.144028 | -2.46316 |
| C | -0.51742 | -0.29437 | -2.35296 |
| H | -1.6145  | -0.27629 | -2.32792 |
| H | -0.22418 | -0.74949 | -3.30322 |
| H | -1.36882 | 1.818501 | -0.7823  |
| C | 1.789784 | 0.841682 | 0.243265 |
| H | 2.156738 | 0.441101 | -0.70012 |
| H | 2.228426 | 1.828431 | 0.393761 |
| H | 2.168855 | 0.196611 | 1.034245 |
| H | 0.991777 | -1.59582 | 1.42753  |

|   |          |          |          |
|---|----------|----------|----------|
| H | -0.56874 | -2.35784 | 1.197975 |
| C | 0.71705  | -2.21545 | -1.35728 |
| H | 0.945979 | -2.58474 | -2.34863 |
| H | 1.091895 | -2.79068 | -0.52306 |
| C | -0.65599 | 1.9897   | -3.40089 |
| H | -0.44476 | 1.528425 | -4.37006 |
| H | -1.74418 | 1.96625  | -3.27155 |
| C | -0.17829 | 3.43796  | -3.38087 |
| H | -0.67746 | 4.014303 | -4.1635  |
| H | 0.893682 | 3.468013 | -3.60024 |
| C | 0.225713 | 3.233865 | -0.90534 |
| H | 1.309537 | 3.244806 | -1.0552  |
| H | 0.033871 | 3.704064 | 0.060377 |
| C | -0.42766 | 4.061719 | -2.01169 |
| H | -0.0508  | 5.087001 | -1.98347 |
| H | -1.50605 | 4.116245 | -1.83112 |

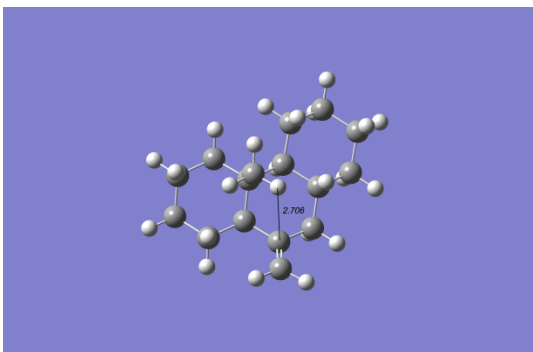

(d) 4''

|   |          |          |          |
|---|----------|----------|----------|
| C | 0.08325  | 0.919971 | 0.274592 |
| C | -0.44271 | -0.53129 | 0.164779 |
| C | 0.011665 | -1.38223 | 1.349381 |
| C | -0.41381 | -0.76884 | 2.67901  |
| C | 0.130834 | 0.648823 | 2.807126 |
| C | -0.30765 | 1.518742 | 1.630979 |
| H | -1.5416  | -0.46261 | 0.207956 |
| H | -1.50676 | -0.74456 | 2.734821 |
| H | -0.06856 | -1.38912 | 3.509457 |
| H | -0.19211 | 1.102685 | 3.747119 |

|   |          |          |          |
|---|----------|----------|----------|
| H | 1.224516 | 0.610282 | 2.834667 |
| H | -1.39733 | 1.639359 | 1.655065 |
| H | 0.122264 | 2.514817 | 1.743545 |
| C | -0.40036 | 1.782141 | -0.9065  |
| C | -0.08746 | -1.1068  | -1.18319 |
| C | -0.04737 | 1.139388 | -2.25627 |
| H | 1.049011 | 1.082305 | -2.31366 |
| C | -0.58839 | -0.29001 | -2.33868 |
| H | -1.68456 | -0.24681 | -2.31825 |
| H | -0.29958 | -0.74698 | -3.28915 |
| H | -1.4994  | 1.831872 | -0.8465  |
| H | 1.102832 | -1.46879 | 1.327675 |
| H | -0.39005 | -2.3932  | 1.247068 |
| C | 0.66133  | -2.20508 | -1.36747 |
| H | 0.892545 | -2.55168 | -2.36633 |
| H | 1.052531 | -2.78848 | -0.54716 |
| C | -0.53861 | 1.988926 | -3.42838 |
| H | -0.25848 | 1.507806 | -4.36984 |
| H | -1.63392 | 2.020755 | -3.40396 |
| C | 0.010727 | 3.41053  | -3.36737 |
| H | -0.37433 | 4.00567  | -4.19877 |
| H | 1.099406 | 3.380529 | -3.47637 |
| C | 0.137743 | 3.217096 | -0.85427 |
| H | 1.233424 | 3.178267 | -0.85774 |
| H | -0.1577  | 3.704313 | 0.075686 |
| C | -0.34452 | 4.06032  | -2.03427 |
| H | 0.079486 | 5.065412 | -1.97208 |
| H | -1.43161 | 4.172694 | -1.96975 |
| H | 1.181296 | 0.868669 | 0.223596 |

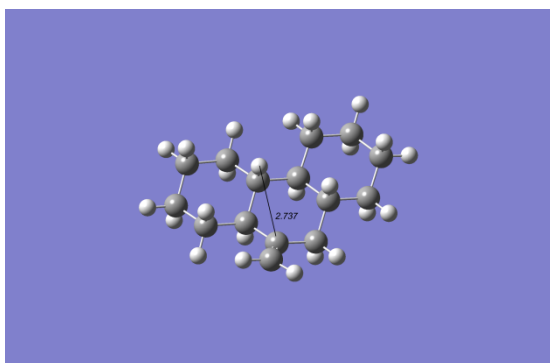

(e) C<sup>10</sup>-alkyl-substituted model (R=Et1)

|   |          |          |          |
|---|----------|----------|----------|
| C | 0.062936 | -0.04315 | -0.00883 |
| C | 0.029952 | -0.02821 | 1.547022 |
| C | 1.394423 | 0.137192 | 2.175976 |
| C | 2.130726 | 1.360379 | 1.700398 |
| C | 2.234882 | 1.376035 | 0.174706 |
| C | 0.86462  | 1.190474 | -0.47723 |
| H | -0.49754 | 0.909821 | 1.792034 |
| H | 1.57519  | 2.251224 | 2.017468 |
| H | 3.119981 | 1.417565 | 2.159904 |
| H | 2.662978 | 2.325613 | -0.15779 |
| H | 2.923844 | 0.597646 | -0.15313 |
| H | 0.2627   | 2.080645 | -0.2558  |
| H | 0.986765 | 1.15994  | -1.5622  |
| C | -1.41452 | 0.132912 | -0.48654 |
| C | -0.83502 | -1.15083 | 2.111438 |
| H | -0.44993 | -2.12791 | 1.807354 |
| H | -0.80419 | -1.12417 | 3.203379 |
| C | -2.38678 | -0.89895 | 0.115203 |
| H | -2.13955 | -1.88551 | -0.2974  |
| C | -2.27331 | -0.97809 | 1.635451 |
| H | -2.67396 | -0.05195 | 2.063737 |
| H | -2.9043  | -1.79122 | 2.00659  |
| H | -1.73501 | 1.115407 | -0.10495 |
| C | 0.621852 | -1.34946 | -0.6285  |
| H | -0.17422 | -2.09671 | -0.63671 |
| H | 0.829354 | -1.13722 | -1.68122 |

|   |          |          |          |
|---|----------|----------|----------|
| C | 1.901868 | -0.67189 | 3.118159 |
| H | 1.379911 | -1.54999 | 3.470973 |
| H | 2.872878 | -0.47359 | 3.553192 |
| C | -3.82749 | -0.58551 | -0.29989 |
| H | -4.49868 | -1.33637 | 0.127212 |
| H | -4.1143  | 0.377545 | 0.137848 |
| C | -3.9935  | -0.51909 | -1.81457 |
| H | -5.02325 | -0.26182 | -2.07396 |
| H | -3.79661 | -1.50701 | -2.24297 |
| C | -1.58114 | 0.167883 | -2.01198 |
| H | -1.31181 | -0.8065  | -2.43031 |
| H | -0.90691 | 0.901638 | -2.4569  |
| C | -3.02005 | 0.490117 | -2.41443 |
| H | -3.27661 | 1.49373  | -2.06017 |
| H | -3.10908 | 0.507456 | -3.50341 |
| C | 1.853283 | -2.03194 | -0.03056 |
| H | 1.679532 | -2.36614 | 0.987736 |
| H | 2.093062 | -2.90797 | -0.63555 |
| H | 2.731419 | -1.39316 | -0.01647 |

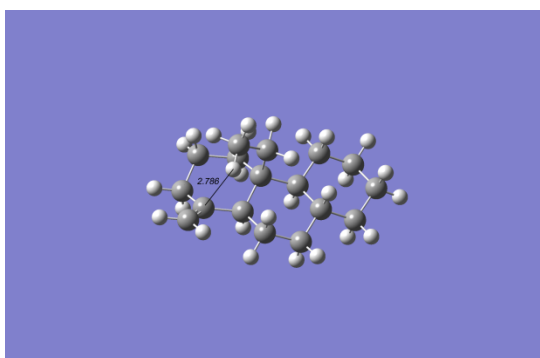

(f) C<sup>10</sup>-alkyl-substituted model (R=Et<sub>2</sub>)

|   |          |          |          |
|---|----------|----------|----------|
| C | -0.00997 | -0.00905 | -0.05493 |
| C | -0.00801 | -0.00869 | 1.509292 |
| C | 1.39752  | 0.051202 | 2.052266 |
| C | 2.159734 | 1.268781 | 1.611807 |
| C | 2.197333 | 1.315985 | 0.08313  |
| C | 0.790176 | 1.227372 | -0.50919 |
| H | -0.48648 | 0.941376 | 1.797935 |



|   |          |          |          |
|---|----------|----------|----------|
| H | 1.655066 | 2.168114 | 1.982854 |
| H | 3.170191 | 1.266354 | 2.026418 |
| H | 2.680063 | 2.236301 | -0.2562  |
| H | 2.812237 | 0.487155 | -0.27419 |
| H | 0.229324 | 2.119105 | -0.20426 |
| H | 0.853511 | 1.261757 | -1.59781 |
| C | -1.49128 | 0.145163 | -0.51021 |
| C | -0.87164 | -1.12479 | 2.085911 |
| H | -0.49291 | -2.1017  | 1.773609 |
| H | -0.81454 | -1.10026 | 3.177109 |
| C | -2.44599 | -0.88995 | 0.114225 |
| H | -2.1899  | -1.87726 | -0.2929  |
| C | -2.31476 | -0.95128 | 1.633441 |
| H | -2.70722 | -0.01854 | 2.054941 |
| H | -2.94324 | -1.758   | 2.022356 |
| H | -1.81331 | 1.128001 | -0.12907 |
| C | 0.634352 | -1.32227 | -0.56436 |
| H | -0.11886 | -2.11294 | -0.55408 |
| C | 1.95628  | -0.90223 | 2.814464 |
| H | 1.421521 | -1.79227 | 3.113343 |
| H | 2.97385  | -0.8006  | 3.169246 |
| C | -3.89737 | -0.59298 | -0.27758 |
| H | -4.5516  | -1.35261 | 0.160177 |
| H | -4.18585 | 0.364813 | 0.170485 |
| C | -4.09876 | -0.51942 | -1.78728 |
| H | -5.13529 | -0.26422 | -2.02039 |
| H | -3.90872 | -1.50381 | -2.22673 |
| C | -1.69636 | 0.164725 | -2.03071 |
| H | -1.45708 | -0.82249 | -2.43595 |
| H | -1.02188 | 0.879239 | -2.50568 |
| C | -3.14111 | 0.495224 | -2.40248 |
| H | -3.38887 | 1.497242 | -2.03764 |
| H | -3.25262 | 0.517571 | -3.48928 |
| C | 1.291712 | -1.30705 | -1.94665 |
| H | 1.655851 | -2.30748 | -2.18353 |
| H | 0.606527 | -1.01129 | -2.73657 |

|   |          |          |          |
|---|----------|----------|----------|
| H | 2.147335 | -0.63562 | -1.98258 |
| H | 1.39339  | -1.63144 | 0.158955 |

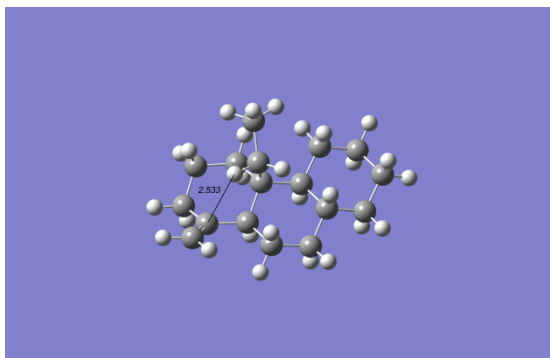

(g) C<sup>10</sup>-alkyl-substituted model (R=Et3)

|   |          |          |          |
|---|----------|----------|----------|
| C | -0.03258 | -0.04774 | 0.004598 |
| C | -0.03753 | -0.02106 | 1.564647 |
| C | 1.375155 | -0.07268 | 2.088261 |
| C | 2.209214 | 1.105421 | 1.661042 |
| C | 2.192808 | 1.261128 | 0.13638  |
| C | 0.768996 | 1.208575 | -0.42233 |
| H | -0.41253 | 0.985078 | 1.815167 |
| H | 1.785992 | 2.012235 | 2.10849  |
| H | 3.23329  | 1.011211 | 2.029356 |
| H | 2.656496 | 2.210473 | -0.14395 |
| H | 2.803377 | 0.47674  | -0.31464 |
| H | 0.222564 | 2.093237 | -0.07593 |
| H | 0.812104 | 1.273139 | -1.51199 |
| C | -1.49253 | 0.114194 | -0.49961 |
| C | -1.0221  | -0.98461 | 2.219078 |
| H | -0.75545 | -2.02282 | 2.021499 |
| H | -0.97557 | -0.85181 | 3.303458 |
| C | -2.52677 | -0.79481 | 0.193122 |
| H | -2.3336  | -1.83259 | -0.09488 |
| C | -2.43156 | -0.70418 | 1.713583 |
| H | -2.72749 | 0.304783 | 2.024573 |
| H | -3.1493  | -1.39425 | 2.167064 |
| H | -1.78074 | 1.141706 | -0.22184 |
| C | 0.713855 | -1.26619 | -0.59151 |

|   |          |          |          |
|---|----------|----------|----------|
| C | 1.866927 | -1.07095 | 2.83785  |
| H | 1.263851 | -1.91517 | 3.140755 |
| H | 2.89451  | -1.05605 | 3.177555 |
| C | -3.93955 | -0.44324 | -0.28151 |
| H | -4.66124 | -1.10375 | 0.207959 |
| H | -4.17396 | 0.576416 | 0.045844 |
| C | -4.07979 | -0.52896 | -1.79826 |
| H | -5.09155 | -0.25143 | -2.10357 |
| H | -3.92657 | -1.56522 | -2.11648 |
| C | -1.63395 | 0.01393  | -2.02491 |
| H | -1.40179 | -1.00468 | -2.34812 |
| H | -0.91745 | 0.671704 | -2.5205  |
| C | -3.0493  | 0.363116 | -2.4832  |
| H | -3.25863 | 1.40933  | -2.23786 |
| H | -3.12527 | 0.272123 | -3.56952 |
| H | 1.682739 | -1.32978 | -0.0949  |
| H | 0.931098 | -1.02451 | -1.63684 |
| C | 0.107942 | -2.67029 | -0.56326 |
| H | -0.81709 | -2.74068 | -1.13031 |
| H | 0.817339 | -3.36412 | -1.01708 |
| H | -0.08563 | -3.02415 | 0.44577  |

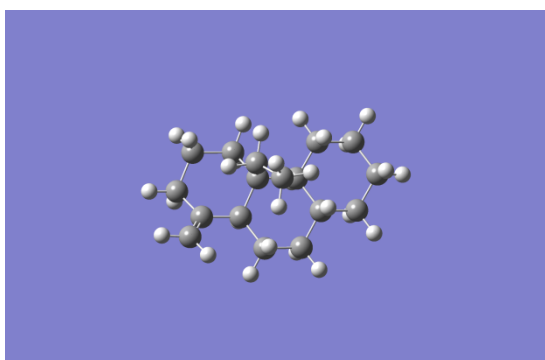

(h) C<sup>10</sup>-alkyl-substituted model (R=ipr1)

|   |          |          |          |
|---|----------|----------|----------|
| C | 0.056513 | -0.16816 | -0.01579 |
| C | 0.008922 | -0.05812 | 1.539877 |
| C | 1.357588 | 0.148948 | 2.188495 |
| C | 2.086193 | 1.362285 | 1.673136 |
| C | 2.19298  | 1.355057 | 0.146005 |

|   |          |          |          |
|---|----------|----------|----------|
| C | 0.841054 | 1.07781  | -0.51405 |
| H | -0.50376 | 0.905741 | 1.703577 |
| H | 1.520187 | 2.253574 | 1.970064 |
| H | 3.074039 | 1.443918 | 2.132314 |
| H | 2.553706 | 2.3286   | -0.19746 |
| H | 2.939362 | 0.630555 | -0.17677 |
| H | 0.205173 | 1.952605 | -0.33392 |
| H | 0.982613 | 1.016605 | -1.59521 |
| C | -1.42169 | 0.034865 | -0.49159 |
| C | -0.89781 | -1.10144 | 2.183874 |
| H | -0.55455 | -2.11323 | 1.960061 |
| H | -0.86267 | -0.99103 | 3.270632 |
| C | -2.46968 | -0.8766  | 0.181043 |
| H | -2.34725 | -1.89915 | -0.17693 |
| C | -2.33077 | -0.88752 | 1.703456 |
| H | -2.67688 | 0.078427 | 2.089986 |
| H | -2.99917 | -1.64561 | 2.122729 |
| H | -1.67571 | 1.047836 | -0.13944 |
| C | 0.729309 | -1.46222 | -0.60913 |
| C | 1.840823 | -0.59634 | 3.193571 |
| H | 1.313958 | -1.45713 | 3.580312 |
| H | 2.797271 | -0.36547 | 3.644587 |
| C | -3.88047 | -0.43369 | -0.21938 |
| H | -4.61413 | -1.09395 | 0.252541 |
| H | -4.06038 | 0.572059 | 0.178169 |
| C | -4.0699  | -0.4163  | -1.73293 |
| H | -5.08165 | -0.09106 | -1.98696 |
| H | -3.95735 | -1.433   | -2.12327 |
| C | -1.61332 | 0.074317 | -2.01557 |
| H | -1.40816 | -0.90335 | -2.45639 |
| H | -0.90608 | 0.772712 | -2.46573 |
| C | -3.03586 | 0.49292  | -2.38885 |
| H | -3.20444 | 1.522856 | -2.05769 |
| H | -3.15333 | 0.487938 | -3.47531 |
| H | 1.043918 | -1.16004 | -1.61562 |
| C | -0.13286 | -2.71816 | -0.81825 |

|   |          |          |          |
|---|----------|----------|----------|
| H | -0.98187 | -2.56172 | -1.47458 |
| H | 0.493426 | -3.48213 | -1.28258 |
| H | -0.49608 | -3.13043 | 0.121395 |
| C | 1.987944 | -1.96007 | 0.11785  |
| H | 1.725616 | -2.43465 | 1.061862 |
| H | 2.475107 | -2.71125 | -0.50665 |
| H | 2.714501 | -1.18868 | 0.337415 |

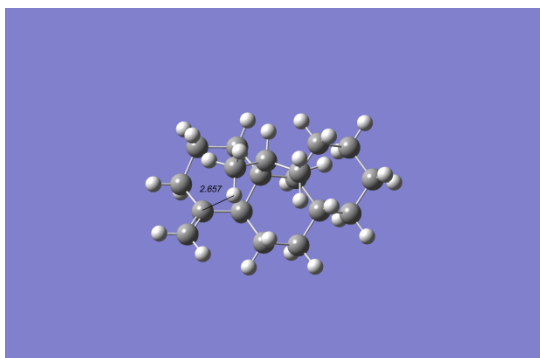

(i) C<sup>10</sup>-alkyl-substituted model (R=ipr2)

|   |          |          |          |
|---|----------|----------|----------|
| C | 0.066171 | -0.04938 | -0.06819 |
| C | 0.046679 | -0.0485  | 1.496851 |
| C | 1.408622 | 0.125621 | 2.132762 |
| C | 2.157542 | 1.336833 | 1.645365 |
| C | 2.229769 | 1.356286 | 0.118809 |
| C | 0.836577 | 1.219464 | -0.49321 |
| H | -0.4773  | 0.892198 | 1.739473 |
| H | 1.626    | 2.237796 | 1.975039 |
| H | 3.15604  | 1.373164 | 2.086736 |
| H | 2.684606 | 2.291128 | -0.21996 |
| H | 2.880484 | 0.551271 | -0.22623 |
| H | 0.242568 | 2.085128 | -0.17531 |
| H | 0.907494 | 1.282656 | -1.57874 |
| C | -1.43149 | 0.130064 | -0.50328 |
| C | -0.82558 | -1.15375 | 2.088324 |
| H | -0.46963 | -2.1436  | 1.796538 |
| H | -0.77717 | -1.10835 | 3.17899  |
| C | -2.3954  | -0.90162 | 0.114922 |
| H | -2.15162 | -1.89002 | -0.29725 |

|   |          |          |          |
|---|----------|----------|----------|
| C | -2.26556 | -0.96961 | 1.633234 |
| H | -2.65283 | -0.03556 | 2.056531 |
| H | -2.89962 | -1.77338 | 2.019342 |
| H | -1.73203 | 1.107272 | -0.09253 |
| C | 0.663946 | -1.35401 | -0.70873 |
| C | 1.901344 | -0.65747 | 3.104367 |
| H | 1.376481 | -1.52729 | 3.472664 |
| H | 2.866515 | -0.4473  | 3.54678  |
| C | -3.84905 | -0.58965 | -0.26018 |
| H | -4.50094 | -1.35698 | 0.1675   |
| H | -4.12936 | 0.358152 | 0.213696 |
| C | -4.06869 | -0.47542 | -1.76367 |
| H | -5.10758 | -0.21273 | -1.97698 |
| H | -3.88384 | -1.4461  | -2.23467 |
| C | -1.66846 | 0.201204 | -2.01808 |
| H | -1.44834 | -0.77191 | -2.46542 |
| H | -0.99923 | 0.929161 | -2.47985 |
| C | -3.11585 | 0.556645 | -2.35427 |
| H | -3.3523  | 1.545466 | -1.94815 |
| H | -3.24103 | 0.620953 | -3.43789 |
| C | 1.724646 | -2.12038 | 0.093499 |
| H | 1.392766 | -2.41351 | 1.0826   |
| H | 1.97819  | -3.02863 | -0.45714 |
| H | 2.639721 | -1.54449 | 0.214684 |
| C | 1.256975 | -1.15027 | -2.11262 |
| H | 2.201622 | -0.60868 | -2.058   |
| H | 1.470173 | -2.12565 | -2.55299 |
| H | 0.604301 | -0.61688 | -2.79538 |
| H | -0.17655 | -2.04663 | -0.82036 |

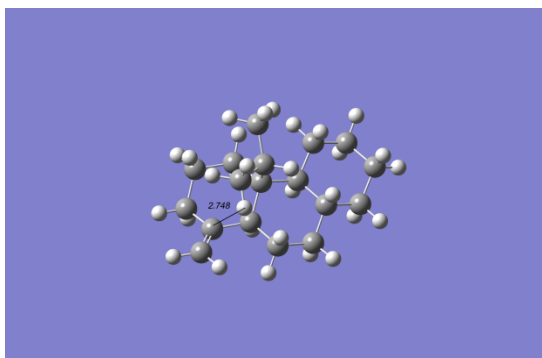

(j) C<sup>10</sup>-alkyl-substituted model (R=ipr3)

|   |          |          |          |
|---|----------|----------|----------|
| C | -0.02934 | -0.08668 | -0.05851 |
| C | -0.03595 | -0.036   | 1.511075 |
| C | 1.36812  | -0.0109  | 2.058929 |
| C | 2.153919 | 1.194079 | 1.621946 |
| C | 2.153774 | 1.295682 | 0.094094 |
| C | 0.736598 | 1.195497 | -0.4756  |
| H | -0.45504 | 0.958774 | 1.735156 |
| H | 1.682755 | 2.093144 | 2.035579 |
| H | 3.175061 | 1.155479 | 2.007961 |
| H | 2.603758 | 2.242281 | -0.21718 |
| H | 2.786212 | 0.5028   | -0.30886 |
| H | 0.161591 | 2.054631 | -0.11157 |
| H | 0.769947 | 1.292604 | -1.56107 |
| C | -1.5095  | 0.07347  | -0.52213 |
| C | -0.98049 | -1.01927 | 2.193397 |
| H | -0.67231 | -2.05149 | 2.031449 |
| H | -0.93252 | -0.85246 | 3.273115 |
| C | -2.53255 | -0.84463 | 0.178917 |
| H | -2.36883 | -1.87395 | -0.15049 |
| C | -2.40397 | -0.79365 | 1.700419 |
| H | -2.73409 | 0.195782 | 2.038702 |
| H | -3.0896  | -1.51881 | 2.149017 |
| H | -1.78291 | 1.093306 | -0.20325 |
| C | 0.742465 | -1.341   | -0.59564 |
| C | 1.893421 | -0.96843 | 2.839012 |
| H | 1.328446 | -1.83714 | 3.146005 |

|   |          |          |          |
|---|----------|----------|----------|
| H | 2.911048 | -0.8933  | 3.200128 |
| C | -3.95788 | -0.45589 | -0.23011 |
| H | -4.66866 | -1.1272  | 0.26078  |
| H | -4.16473 | 0.551644 | 0.149328 |
| C | -4.1634  | -0.47137 | -1.74097 |
| H | -5.18214 | -0.16406 | -1.98926 |
| H | -4.04152 | -1.49358 | -2.11346 |
| C | -1.72212 | 0.031156 | -2.04221 |
| H | -1.54372 | -0.98236 | -2.40959 |
| H | -1.00825 | 0.683366 | -2.54826 |
| C | -3.14532 | 0.435058 | -2.42408 |
| H | -3.32109 | 1.471882 | -2.11942 |
| H | -3.26602 | 0.399271 | -3.50959 |
| C | 1.349308 | -1.18668 | -2.0002  |
| H | 1.923024 | -2.08548 | -2.23251 |
| H | 0.583917 | -1.08374 | -2.76651 |
| H | 2.028262 | -0.34274 | -2.08686 |
| H | 1.587946 | -1.4614  | 0.088661 |
| C | 0.003363 | -2.68645 | -0.58802 |
| H | -0.77889 | -2.71881 | -1.34564 |
| H | 0.716851 | -3.47596 | -0.83085 |
| H | -0.44213 | -2.937   | 0.3684   |

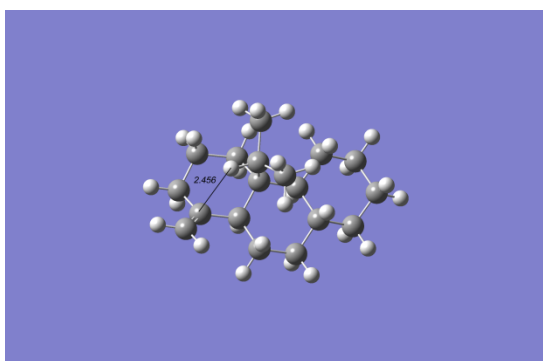

(k) C<sup>10</sup>-alkyl-substituted model (R=tbu)

|   |          |          |          |
|---|----------|----------|----------|
| C | 0.060039 | -0.18998 | -0.08134 |
| C | 0.019985 | -0.09841 | 1.485286 |
| C | 1.358122 | 0.145672 | 2.147956 |
| C | 2.082098 | 1.358075 | 1.623567 |



|   |          |          |          |
|---|----------|----------|----------|
| C | 2.173092 | 1.346289 | 0.096743 |
| C | 0.80204  | 1.099842 | -0.53166 |
| H | -0.51238 | 0.854305 | 1.650473 |
| H | 1.520316 | 2.251756 | 1.921726 |
| H | 3.073311 | 1.438732 | 2.075568 |
| H | 2.552251 | 2.310558 | -0.25327 |
| H | 2.89616  | 0.599436 | -0.23039 |
| H | 0.163687 | 1.944077 | -0.24581 |
| H | 0.884658 | 1.14433  | -1.61628 |
| C | -1.44006 | 0.015532 | -0.51806 |
| C | -0.86907 | -1.15024 | 2.141569 |
| H | -0.52129 | -2.16133 | 1.927148 |
| H | -0.8239  | -1.02999 | 3.226829 |
| C | -2.48766 | -0.89002 | 0.166439 |
| H | -2.41025 | -1.90177 | -0.23233 |
| C | -2.31056 | -0.94698 | 1.684804 |
| H | -2.66106 | 0.003695 | 2.103728 |
| H | -2.96305 | -1.72289 | 2.096586 |
| H | -1.67139 | 1.023301 | -0.13747 |
| C | 0.760767 | -1.497   | -0.67406 |
| C | 1.832948 | -0.55977 | 3.185572 |
| H | 1.317786 | -1.42098 | 3.586547 |
| H | 2.775077 | -0.29593 | 3.648456 |
| C | -3.90124 | -0.39358 | -0.16115 |
| H | -4.6321  | -1.05151 | 0.318455 |
| H | -4.03467 | 0.60005  | 0.282479 |
| C | -4.15916 | -0.30856 | -1.66128 |
| H | -5.16887 | 0.06205  | -1.85385 |
| H | -4.10124 | -1.3109  | -2.09775 |
| C | -1.70434 | 0.096334 | -2.03039 |
| H | -1.58024 | -0.88308 | -2.49645 |
| H | -0.98681 | 0.7667   | -2.50622 |
| C | -3.12128 | 0.589405 | -2.32482 |
| H | -3.23365 | 1.610867 | -1.94688 |
| H | -3.2829  | 0.632413 | -3.40477 |
| C | -0.17303 | -2.71062 | -0.84181 |

|   |          |          |          |
|---|----------|----------|----------|
| H | -0.96156 | -2.53924 | -1.56926 |
| H | 0.424712 | -3.54763 | -1.20833 |
| H | -0.62686 | -3.02633 | 0.093773 |
| C | 1.919949 | -2.02075 | 0.192142 |
| H | 1.57471  | -2.39026 | 1.154192 |
| H | 2.386473 | -2.85504 | -0.33681 |
| H | 2.689246 | -1.28006 | 0.382224 |
| C | 1.355248 | -1.23198 | -2.07098 |
| H | 2.19113  | -0.5353  | -2.03451 |
| H | 1.737467 | -2.1731  | -2.4708  |
| H | 0.619826 | -0.85041 | -2.77546 |

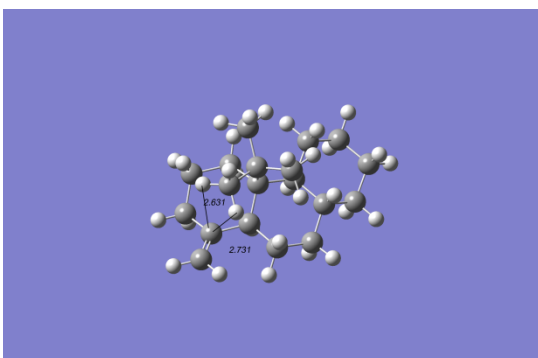

(l) 5'

|   |          |          |          |
|---|----------|----------|----------|
| C | 0.167315 | 0.145659 | 0.548834 |
| C | -0.35131 | -1.2354  | 1.023065 |
| C | -0.10985 | -1.48978 | 2.511752 |
| C | -0.72625 | -0.38537 | 3.375794 |
| C | -0.26805 | 0.963689 | 2.898308 |
| C | -0.50284 | 1.22087  | 1.435315 |
| H | -1.44318 | -1.20711 | 0.881933 |
| H | -1.81719 | -0.44547 | 3.286927 |
| H | -0.47866 | -0.52806 | 4.429978 |
| H | -1.58145 | 1.207493 | 1.230849 |
| H | -0.13455 | 2.215298 | 1.175726 |
| C | -0.26342 | 0.339188 | -0.93041 |
| C | 0.174505 | -2.37519 | 0.154559 |
| H | 1.262846 | -2.44115 | 0.242128 |
| H | -0.22283 | -3.32506 | 0.524589 |

|   |          |          |          |
|---|----------|----------|----------|
| C | 0.201092 | -0.81033 | -1.84352 |
| H | 1.298    | -0.78502 | -1.88702 |
| C | -0.22778 | -2.17246 | -1.30127 |
| H | -1.31864 | -2.24706 | -1.37909 |
| H | 0.184996 | -2.96504 | -1.93253 |
| H | -1.36523 | 0.311512 | -0.92995 |
| C | 1.686776 | 0.269515 | 0.708102 |
| H | 2.230427 | -0.42972 | 0.074771 |
| H | 2.013014 | 1.276888 | 0.448069 |
| H | 1.989208 | 0.09755  | 1.739566 |
| C | -0.32018 | -0.61722 | -3.2705  |
| H | 0.042986 | -1.43313 | -3.9022  |
| H | -1.41328 | -0.69631 | -3.25342 |
| C | 0.074641 | 0.732928 | -3.85948 |
| H | -0.34258 | 0.846889 | -4.86284 |
| H | 1.163489 | 0.778886 | -3.96217 |
| C | 0.153657 | 1.686476 | -1.53488 |
| H | 1.245534 | 1.745174 | -1.57298 |
| H | -0.18659 | 2.511845 | -0.90703 |
| C | -0.39116 | 1.865902 | -2.95124 |
| H | -1.48538 | 1.876076 | -2.91862 |
| H | -0.07822 | 2.832776 | -3.35275 |
| C | 0.340255 | 1.851191 | 3.698798 |
| H | 0.674096 | 2.810675 | 3.325899 |
| H | 0.510272 | 1.641872 | 4.746929 |
| H | 0.962271 | -1.56072 | 2.71276  |
| H | -0.54132 | -2.45826 | 2.780942 |

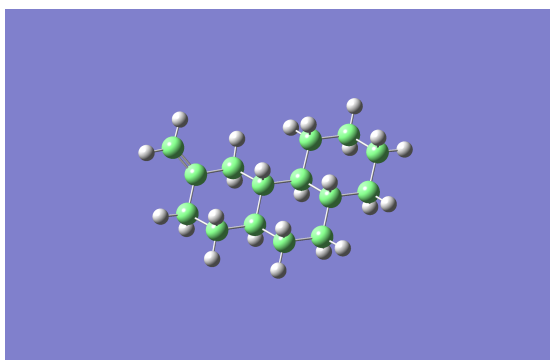

(m) 6'

|   |          |          |          |
|---|----------|----------|----------|
| C | -0.17773 | -0.66239 | -0.14368 |
| C | -0.38514 | 0.80276  | 0.260582 |
| C | -1.69304 | 1.344761 | -0.31688 |
| C | -2.89169 | 0.487457 | 0.084911 |
| C | -2.68271 | -0.96988 | -0.32135 |
| C | -1.37956 | -1.51685 | 0.25798  |
| H | -0.46444 | 0.828008 | 1.357995 |
| H | -3.02344 | 0.541996 | 1.170237 |
| H | -3.80676 | 0.880968 | -0.36377 |
| H | -3.52808 | -1.58127 | 0.002831 |
| H | -2.64502 | -1.03643 | -1.41326 |
| H | -1.44754 | -1.53349 | 1.351751 |
| H | -1.22167 | -2.55031 | -0.06331 |
| C | 1.131522 | -1.208   | 0.441069 |
| H | 1.296457 | -2.23457 | 0.103284 |
| C | 0.814599 | 1.658649 | -0.14439 |
| H | 0.888654 | 1.668524 | -1.23682 |
| H | 0.657978 | 2.692974 | 0.175088 |
| C | 2.294717 | -0.33223 | 0.066275 |
| C | 2.123246 | 1.114636 | 0.43961  |
| H | 2.084124 | 1.205622 | 1.531116 |
| H | 2.975847 | 1.70405  | 0.095717 |
| H | 1.03128  | -1.23818 | 1.533439 |
| H | -1.61128 | 1.364073 | -1.4095  |
| H | -1.83786 | 2.379564 | 0.006039 |
| C | 3.364008 | -0.79102 | -0.59914 |
| H | 3.452675 | -1.83381 | -0.87411 |
| H | 4.179002 | -0.13585 | -0.8775  |
| H | -0.08932 | -0.68924 | -1.23915 |

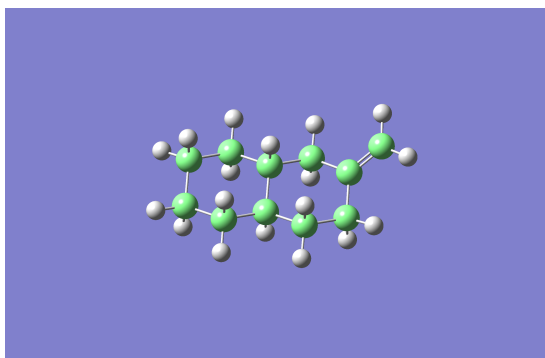

(n) 7'

|   |          |          |          |
|---|----------|----------|----------|
| C | 0.195324 | 1.082614 | 0.272509 |
| C | 0.065329 | -0.38977 | -0.19444 |
| C | -0.19012 | -1.35272 | 0.98098  |
| C | -1.43931 | -0.91986 | 1.767554 |
| C | -1.34644 | 0.534097 | 2.223112 |
| C | -1.06754 | 1.468642 | 1.051117 |
| H | -0.83855 | -0.4286  | -0.8245  |
| H | -2.28975 | -0.99738 | 1.073024 |
| H | -2.28063 | 0.821157 | 2.715201 |
| H | -0.56084 | 0.625056 | 2.979195 |
| H | -1.9217  | 1.43746  | 0.364875 |
| H | -0.97833 | 2.504379 | 1.395318 |
| C | 0.303638 | 1.986712 | -0.97269 |
| H | 0.40405  | 3.030867 | -0.66043 |
| C | 1.242815 | -0.80011 | -1.08586 |
| H | 2.166416 | -0.81275 | -0.49996 |
| H | 1.096371 | -1.81373 | -1.46098 |
| C | 1.451787 | 1.57954  | -1.85009 |
| C | 1.400273 | 0.142966 | -2.2863  |
| H | 0.534164 | 0.002987 | -2.94393 |
| H | 2.28929  | -0.11762 | -2.86514 |
| H | -0.63352 | 1.904027 | -1.53745 |
| C | 1.435915 | 1.312909 | 1.142385 |
| H | 2.354486 | 1.162727 | 0.577782 |
| H | 1.439253 | 2.345349 | 1.499472 |
| H | 1.463406 | 0.661966 | 2.01418  |

|   |          |          |          |
|---|----------|----------|----------|
| H | 0.669038 | -1.30723 | 1.664706 |
| C | 2.451636 | 2.409676 | -2.17999 |
| H | 2.465829 | 3.437244 | -1.841   |
| H | 3.273598 | 2.083197 | -2.80377 |
| C | -1.71429 | -1.85864 | 2.94238  |
| H | -2.61321 | -1.52823 | 3.470818 |
| C | -0.33828 | -2.8123  | 0.53474  |
| H | -1.15547 | -2.87591 | -0.19385 |
| C | -0.62728 | -3.74804 | 1.708311 |
| H | 0.236959 | -3.7502  | 2.380469 |
| H | -0.74684 | -4.77253 | 1.347625 |
| C | -1.86195 | -3.30693 | 2.487203 |
| H | -2.0286  | -3.96338 | 3.344548 |
| H | -2.74448 | -3.39371 | 1.845501 |
| H | -0.88471 | -1.78358 | 3.654749 |
| H | 0.565416 | -3.15081 | 0.026195 |

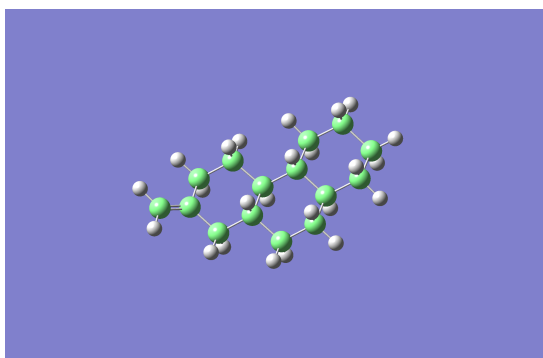

(o) 8'

|   |          |          |          |
|---|----------|----------|----------|
| C | -0.08246 | 0.150767 | 0.078008 |
| C | -0.02794 | 0.08608  | 1.612951 |
| C | 1.40934  | -0.03109 | 2.120522 |
| C | 2.286357 | 1.117255 | 1.61527  |
| C | 2.20946  | 1.184765 | 0.116727 |
| C | 0.814349 | 1.290843 | -0.435   |
| H | -0.4416  | 1.033627 | 1.990132 |
| H | 1.918274 | 2.056429 | 2.043653 |
| H | 3.320261 | 0.992782 | 1.944131 |
| H | 0.365532 | 2.242982 | -0.12254 |

|   |          |          |          |
|---|----------|----------|----------|
| H | 0.854461 | 1.294352 | -1.52468 |
| C | -1.53306 | 0.267113 | -0.4228  |
| C | -0.89747 | -1.04969 | 2.146244 |
| H | -0.47306 | -2.00369 | 1.813878 |
| H | -0.86651 | -1.05561 | 3.239716 |
| C | -2.399   | -0.87765 | 0.127812 |
| H | -1.97803 | -1.81575 | -0.26377 |
| C | -2.33385 | -0.93442 | 1.65149  |
| H | -2.78714 | -0.02319 | 2.057887 |
| H | -2.93412 | -1.77331 | 2.015791 |
| H | -1.94383 | 1.208883 | -0.02537 |
| C | -3.84269 | -0.77304 | -0.36502 |
| H | -4.42387 | -1.61114 | 0.030136 |
| H | -4.28814 | 0.140293 | 0.04565  |
| C | -3.92435 | -0.73391 | -1.88761 |
| H | -4.96259 | -0.63346 | -2.21262 |
| H | -3.55582 | -1.6817  | -2.29263 |
| C | -1.63252 | 0.318563 | -1.95148 |
| H | -1.1678  | -0.58586 | -2.36174 |
| H | -1.07    | 1.167301 | -2.34317 |
| C | -3.07896 | 0.410848 | -2.43587 |
| H | -3.5057  | 1.362112 | -2.10184 |
| H | -3.10693 | 0.420215 | -3.52811 |
| C | 3.289781 | 1.093521 | -0.67188 |
| H | 3.20516  | 1.119111 | -1.75041 |
| H | 4.284583 | 0.998748 | -0.25672 |
| H | 1.830582 | -0.98076 | 1.774515 |
| H | 1.411076 | -0.05954 | 3.214038 |
| H | 0.329085 | -0.79453 | -0.30718 |

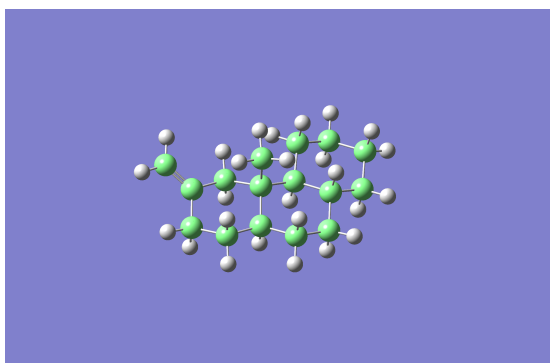

(p) 9'

|   |          |          |          |
|---|----------|----------|----------|
| C | 0.169256 | -0.616   | -0.004   |
| C | 0.381566 | 0.899123 | -0.22465 |
| C | 1.711824 | 1.385296 | 0.352032 |
| C | 2.889007 | 0.601851 | -0.22834 |
| C | 2.708029 | -0.90421 | -0.04386 |
| C | 1.364639 | -1.36684 | -0.60807 |
| H | 0.442711 | 1.03638  | -1.31559 |
| H | 2.962368 | 0.820963 | -1.29861 |
| H | 3.826938 | 0.931512 | 0.224843 |
| H | 3.520422 | -1.44253 | -0.53812 |
| H | 2.774267 | -1.15444 | 1.017907 |
| H | 1.363665 | -1.20301 | -1.69197 |
| H | 1.233288 | -2.44248 | -0.45225 |
| C | -1.12104 | -1.03049 | -0.73968 |
| H | -1.31111 | -2.09704 | -0.58442 |
| C | -0.80973 | 1.725646 | 0.258218 |
| H | -0.9119  | 1.635381 | 1.343021 |
| H | -0.627   | 2.783494 | 0.048108 |
| C | -2.29796 | -0.21032 | -0.28828 |
| C | -2.1077  | 1.27629  | -0.42453 |
| H | -2.04067 | 1.530709 | -1.48878 |
| H | -2.96825 | 1.812375 | -0.01827 |
| H | -0.96426 | -0.88068 | -1.81529 |
| C | 0.018983 | -0.97794 | 1.477326 |
| H | -0.89603 | -0.56524 | 1.898674 |
| H | -0.03635 | -2.06398 | 1.580284 |



|   |          |          |          |
|---|----------|----------|----------|
| H | 0.856042 | -0.63182 | 2.080867 |
| H | 1.702065 | 1.292564 | 1.441989 |
| H | 1.828613 | 2.451044 | 0.135151 |
| C | -3.4074  | -0.75599 | 0.230911 |
| H | -3.51517 | -1.82825 | 0.329117 |
| H | -4.23646 | -0.14355 | 0.560884 |

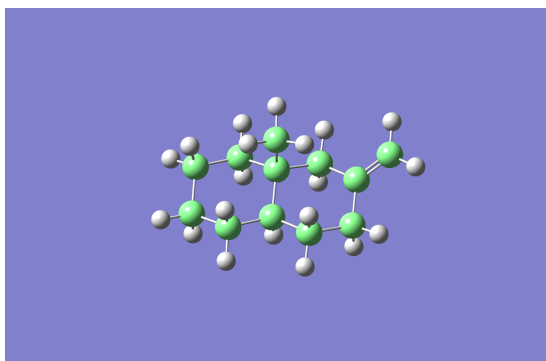

(q) 10'

|   |          |          |          |
|---|----------|----------|----------|
| C | -0.05477 | 0.11373  | 0.061814 |
| C | -0.05278 | 0.091136 | 1.599176 |
| C | 1.385825 | 0.049886 | 2.148528 |
| C | 2.225952 | 1.209671 | 1.588642 |
| C | 2.20902  | 1.218798 | 0.062741 |
| C | 0.786119 | 1.266385 | -0.4789  |
| H | -0.50875 | 1.033813 | 1.941747 |
| H | 1.757883 | 2.142564 | 1.937077 |
| H | 2.790064 | 2.06837  | -0.30793 |
| H | 2.707561 | 0.313421 | -0.30135 |
| H | 0.31633  | 2.212657 | -0.18747 |
| H | 0.78861  | 1.239941 | -1.57257 |
| C | -1.48425 | 0.163584 | -0.49454 |
| H | -1.45959 | 0.134657 | -1.58718 |
| C | -0.91726 | -1.06508 | 2.114229 |
| H | -0.44725 | -2.0113  | 1.824415 |
| H | -0.96783 | -1.05283 | 3.203782 |
| C | -2.31448 | -0.96233 | 0.0498   |
| C | -2.3425  | -1.01998 | 1.54992  |
| H | -2.84144 | -0.12406 | 1.937086 |

|   |          |          |          |
|---|----------|----------|----------|
| H | -2.91636 | -1.88352 | 1.893293 |
| H | -1.93052 | 1.123532 | -0.20535 |
| H | 1.845252 | -0.88696 | 1.795836 |
| C | -2.9211  | -1.86727 | -0.73078 |
| H | -2.8648  | -1.80958 | -1.80986 |
| H | -3.49445 | -2.68218 | -0.30871 |
| C | 3.656108 | 1.176108 | 2.128759 |
| H | 4.217874 | 2.022746 | 1.723844 |
| C | 1.438893 | 0.052208 | 3.680639 |
| H | 0.928462 | 0.951432 | 4.045696 |
| C | 2.871392 | 0.030853 | 4.21249  |
| H | 3.343708 | -0.91356 | 3.923416 |
| H | 2.864221 | 0.057163 | 5.30479  |
| C | 3.690929 | 1.188934 | 3.653452 |
| H | 4.721302 | 1.138487 | 4.013236 |
| H | 3.274775 | 2.134425 | 4.015474 |
| H | 4.148036 | 0.267828 | 1.762346 |
| H | 0.896358 | -0.80373 | 4.084067 |
| H | 0.398434 | -0.82887 | -0.27683 |

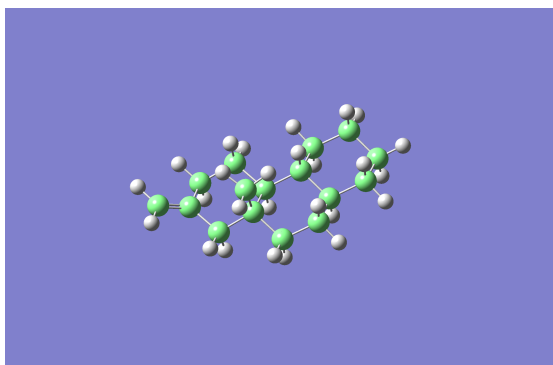

Supplement: c2ra21446f.pdf [file c2ra21446f.pdf]
